# Supplementary material for: Use of Mobile and Computer Devices to Support Recovery in People With Serious Mental Illness: Survey Study
Source: PubMed Central journal article supplement (PMC6401671; doi:10.2196/12255), 2019-02-20
Supplement: mental_v6i2e12255_app1.pdf [file mental_v6i2e12255_app1.pdf]

## APPENDIX 1: Technology Use Survey

### I. Electronic Devices

Do you own either a Smartphone (e.g., LG, Android, iPhone), Flip phone, Laptop/Computer, or iPad/Tablet?

- Yes
- No ***If no, skip to end.***

What type of cell phone do you have?

- Flip phone ***If flip phone, skip to Section III - Interest in Technology.***
- Smartphone (e.g., LG, Android, iPhone)
- I don't have a cell phone but I have a laptop/computer or iPad/tablet

### II. Use of Technology

What kinds of electronic devices do you have and how often do you use them?  
(Mark only one oval per row)

|                    | Yes:                  |                       |                       |                       |                       |                        |                       |
|--------------------|-----------------------|-----------------------|-----------------------|-----------------------|-----------------------|------------------------|-----------------------|
|                    | No                    | every day             | few times a week      | once a week           | once a month          | less than once a month | never use it          |
| iPhone             | <input type="radio"/> | <input type="radio"/> | <input type="radio"/> | <input type="radio"/> | <input type="radio"/> | <input type="radio"/>  | <input type="radio"/> |
| Android            | <input type="radio"/> | <input type="radio"/> | <input type="radio"/> | <input type="radio"/> | <input type="radio"/> | <input type="radio"/>  | <input type="radio"/> |
| Laptop or Computer | <input type="radio"/> | <input type="radio"/> | <input type="radio"/> | <input type="radio"/> | <input type="radio"/> | <input type="radio"/>  | <input type="radio"/> |
| iPad or Tablet     | <input type="radio"/> | <input type="radio"/> | <input type="radio"/> | <input type="radio"/> | <input type="radio"/> | <input type="radio"/>  | <input type="radio"/> |

How often do you use them for...

(Mark only one oval per row)

|                                                             | Every day             | Few times a week      | Once a week           | Few times a month     | Almost never          | Never                 |
|-------------------------------------------------------------|-----------------------|-----------------------|-----------------------|-----------------------|-----------------------|-----------------------|
| Calling                                                     | <input type="radio"/> | <input type="radio"/> | <input type="radio"/> | <input type="radio"/> | <input type="radio"/> | <input type="radio"/> |
| Texting                                                     | <input type="radio"/> | <input type="radio"/> | <input type="radio"/> | <input type="radio"/> | <input type="radio"/> | <input type="radio"/> |
| Music                                                       | <input type="radio"/> | <input type="radio"/> | <input type="radio"/> | <input type="radio"/> | <input type="radio"/> | <input type="radio"/> |
| Social media (e.g., Facebook, Snapchat, Twitter, Instagram) | <input type="radio"/> | <input type="radio"/> | <input type="radio"/> | <input type="radio"/> | <input type="radio"/> | <input type="radio"/> |
| Internet (e.g., Google, Internet Explorer, Firefox)         | <input type="radio"/> | <input type="radio"/> | <input type="radio"/> | <input type="radio"/> | <input type="radio"/> | <input type="radio"/> |
| Email                                                       | <input type="radio"/> | <input type="radio"/> | <input type="radio"/> | <input type="radio"/> | <input type="radio"/> | <input type="radio"/> |
| Games I play alone                                          | <input type="radio"/> | <input type="radio"/> | <input type="radio"/> | <input type="radio"/> | <input type="radio"/> | <input type="radio"/> |
| Games I play with others                                    | <input type="radio"/> | <input type="radio"/> | <input type="radio"/> | <input type="radio"/> | <input type="radio"/> | <input type="radio"/> |
| Reading books                                               | <input type="radio"/> | <input type="radio"/> | <input type="radio"/> | <input type="radio"/> | <input type="radio"/> | <input type="radio"/> |
| News/current events                                         | <input type="radio"/> | <input type="radio"/> | <input type="radio"/> | <input type="radio"/> | <input type="radio"/> | <input type="radio"/> |
| Calendar/appointment book                                   | <input type="radio"/> | <input type="radio"/> | <input type="radio"/> | <input type="radio"/> | <input type="radio"/> | <input type="radio"/> |
| Calculator                                                  | <input type="radio"/> | <input type="radio"/> | <input type="radio"/> | <input type="radio"/> | <input type="radio"/> | <input type="radio"/> |
| Weather                                                     | <input type="radio"/> | <input type="radio"/> | <input type="radio"/> | <input type="radio"/> | <input type="radio"/> | <input type="radio"/> |
| Clock/alarm                                                 | <input type="radio"/> | <input type="radio"/> | <input type="radio"/> | <input type="radio"/> | <input type="radio"/> | <input type="radio"/> |

|                                                                     |                       |                       |                       |                       |                       |                       |
|---------------------------------------------------------------------|-----------------------|-----------------------|-----------------------|-----------------------|-----------------------|-----------------------|
| Personal assistant (e.g., Siri, Cortana, Google)                    | <input type="radio"/> | <input type="radio"/> | <input type="radio"/> | <input type="radio"/> | <input type="radio"/> | <input type="radio"/> |
| Notepad/memos                                                       | <input type="radio"/> | <input type="radio"/> | <input type="radio"/> | <input type="radio"/> | <input type="radio"/> | <input type="radio"/> |
| Food/nutrition                                                      | <input type="radio"/> | <input type="radio"/> | <input type="radio"/> | <input type="radio"/> | <input type="radio"/> | <input type="radio"/> |
| Fitness                                                             | <input type="radio"/> | <input type="radio"/> | <input type="radio"/> | <input type="radio"/> | <input type="radio"/> | <input type="radio"/> |
| Physical symptom monitoring (e.g., blood pressure or insulin level) | <input type="radio"/> | <input type="radio"/> | <input type="radio"/> | <input type="radio"/> | <input type="radio"/> | <input type="radio"/> |
| Mental health symptom monitoring (e.g., mood or anxiety)            | <input type="radio"/> | <input type="radio"/> | <input type="radio"/> | <input type="radio"/> | <input type="radio"/> | <input type="radio"/> |
| Mood management                                                     | <input type="radio"/> | <input type="radio"/> | <input type="radio"/> | <input type="radio"/> | <input type="radio"/> | <input type="radio"/> |
| Anxiety/stress management                                           | <input type="radio"/> | <input type="radio"/> | <input type="radio"/> | <input type="radio"/> | <input type="radio"/> | <input type="radio"/> |
| Cognitive Behavioral therapy (CBT)                                  | <input type="radio"/> | <input type="radio"/> | <input type="radio"/> | <input type="radio"/> | <input type="radio"/> | <input type="radio"/> |
| Dialectical Behavior Therapy (DBT)                                  | <input type="radio"/> | <input type="radio"/> | <input type="radio"/> | <input type="radio"/> | <input type="radio"/> | <input type="radio"/> |
| Meditation                                                          | <input type="radio"/> | <input type="radio"/> | <input type="radio"/> | <input type="radio"/> | <input type="radio"/> | <input type="radio"/> |
| Relaxation                                                          | <input type="radio"/> | <input type="radio"/> | <input type="radio"/> | <input type="radio"/> | <input type="radio"/> | <input type="radio"/> |
| Sleep                                                               | <input type="radio"/> | <input type="radio"/> | <input type="radio"/> | <input type="radio"/> | <input type="radio"/> | <input type="radio"/> |

Which features/apps help to support your recovery?

Mark only one oval per row.

|                                                                     | Yes                   | Yes but would like to learn how to use it more | No                    | No, but I would like to learn how to use it |
|---------------------------------------------------------------------|-----------------------|------------------------------------------------|-----------------------|---------------------------------------------|
| Phone                                                               | <input type="radio"/> | <input type="radio"/>                          | <input type="radio"/> | <input type="radio"/>                       |
| Text                                                                | <input type="radio"/> | <input type="radio"/>                          | <input type="radio"/> | <input type="radio"/>                       |
| Music                                                               | <input type="radio"/> | <input type="radio"/>                          | <input type="radio"/> | <input type="radio"/>                       |
| Social media (e.g., Facebook, Snapchat, Twitter, Instagram)         | <input type="radio"/> | <input type="radio"/>                          | <input type="radio"/> | <input type="radio"/>                       |
| Internet (e.g., Google, Internet Explorer, Firefox)                 | <input type="radio"/> | <input type="radio"/>                          | <input type="radio"/> | <input type="radio"/>                       |
| Email                                                               | <input type="radio"/> | <input type="radio"/>                          | <input type="radio"/> | <input type="radio"/>                       |
| Maps/navigation                                                     | <input type="radio"/> | <input type="radio"/>                          | <input type="radio"/> | <input type="radio"/>                       |
| Games I play alone                                                  | <input type="radio"/> | <input type="radio"/>                          | <input type="radio"/> | <input type="radio"/>                       |
| Games I play with others                                            | <input type="radio"/> | <input type="radio"/>                          | <input type="radio"/> | <input type="radio"/>                       |
| Reading books                                                       | <input type="radio"/> | <input type="radio"/>                          | <input type="radio"/> | <input type="radio"/>                       |
| News/current events                                                 | <input type="radio"/> | <input type="radio"/>                          | <input type="radio"/> | <input type="radio"/>                       |
| Calendar/appointment book                                           | <input type="radio"/> | <input type="radio"/>                          | <input type="radio"/> | <input type="radio"/>                       |
| Calculator                                                          | <input type="radio"/> | <input type="radio"/>                          | <input type="radio"/> | <input type="radio"/>                       |
| Weather                                                             | <input type="radio"/> | <input type="radio"/>                          | <input type="radio"/> | <input type="radio"/>                       |
| Clock/alarm                                                         | <input type="radio"/> | <input type="radio"/>                          | <input type="radio"/> | <input type="radio"/>                       |
| Notepad/memos                                                       | <input type="radio"/> | <input type="radio"/>                          | <input type="radio"/> | <input type="radio"/>                       |
| Food/nutrition                                                      | <input type="radio"/> | <input type="radio"/>                          | <input type="radio"/> | <input type="radio"/>                       |
| Fitness                                                             | <input type="radio"/> | <input type="radio"/>                          | <input type="radio"/> | <input type="radio"/>                       |
| Physical symptom monitoring (e.g., blood pressure or insulin level) | <input type="radio"/> | <input type="radio"/>                          | <input type="radio"/> | <input type="radio"/>                       |
| Mental health symptom monitoring (e.g., mood or anxiety)            | <input type="radio"/> | <input type="radio"/>                          | <input type="radio"/> | <input type="radio"/>                       |
| Mood management                                                     | <input type="radio"/> | <input type="radio"/>                          | <input type="radio"/> | <input type="radio"/>                       |
| Anxiety/stress management                                           | <input type="radio"/> | <input type="radio"/>                          | <input type="radio"/> | <input type="radio"/>                       |
| Cognitive Behavioral therapy (CBT)                                  | <input type="radio"/> | <input type="radio"/>                          | <input type="radio"/> | <input type="radio"/>                       |
| Dialectical Behavior Therapy                                        | <input type="radio"/> | <input type="radio"/>                          | <input type="radio"/> | <input type="radio"/>                       |

|            |                       |                       |                       |                       |
|------------|-----------------------|-----------------------|-----------------------|-----------------------|
| (DBT)      |                       |                       |                       |                       |
| Meditation | <input type="radio"/> | <input type="radio"/> | <input type="radio"/> | <input type="radio"/> |
| Relaxation | <input type="radio"/> | <input type="radio"/> | <input type="radio"/> | <input type="radio"/> |
| Sleep      | <input type="radio"/> | <input type="radio"/> | <input type="radio"/> | <input type="radio"/> |

How easy is it to figure out, on your own, how a new app or electronic device works?

Mark only one oval.

- Very easy
- Easy
- Sometimes easy/sometimes hard
- Hard
- Very hard

When you don't know how to do something on your device, what are you most likely to do?

Mark only one oval.

- Nothing
- Get help from family or friends
- Ask my clinician/case manager
- Ask my mobile service provider (e.g., Verizon, Sprint, etc.)
- Go to the place where I purchased the device (e.g., Best Buy, Walmart, etc.)
- Research it online (e.g., "Google it")

How comfortable do you feel doing this?

Mark only one oval.

|                    |                       |                       |                       |                       |                       |                       |                       |                       |                       |                       |                  |
|--------------------|-----------------------|-----------------------|-----------------------|-----------------------|-----------------------|-----------------------|-----------------------|-----------------------|-----------------------|-----------------------|------------------|
|                    | 1                     | 2                     | 3                     | 4                     | 5                     | 6                     | 7                     | 8                     | 9                     | 10                    |                  |
| Very Uncomfortable | <input type="radio"/> | <input type="radio"/> | <input type="radio"/> | <input type="radio"/> | <input type="radio"/> | <input type="radio"/> | <input type="radio"/> | <input type="radio"/> | <input type="radio"/> | <input type="radio"/> | Very Comfortable |

**III. Interest in Technology**

Does your care manager or mentor ever talk with you about using technology to support your recovery?

Mark only one oval.

|           |                       |                       |                       |                       |                       |                       |                       |                       |                       |                       |                     |
|-----------|-----------------------|-----------------------|-----------------------|-----------------------|-----------------------|-----------------------|-----------------------|-----------------------|-----------------------|-----------------------|---------------------|
|           | 1                     | 2                     | 3                     | 4                     | 5                     | 6                     | 7                     | 8                     | 9                     | 10                    |                     |
| No, never | <input type="radio"/> | <input type="radio"/> | <input type="radio"/> | <input type="radio"/> | <input type="radio"/> | <input type="radio"/> | <input type="radio"/> | <input type="radio"/> | <input type="radio"/> | <input type="radio"/> | Yes, at every visit |

What is your interest in trying new technologies?

Mark only one oval.

- Very interested, would definitely try new apps/technology
- Somewhat interested, would probably try new apps/technology
- Unsure, may or may not try new apps/technology
- Not interested, would probably not try new apps/technology

If there was a staff member here at the clinic who was supposed to help people with their electronic devices, would you go to that staff member for help with your devices?

*Mark only one oval.*

- Yes, definitely
- Probably
- Maybe/maybe not
- Probably not
- No, definitely not
